# Supplementary material for: Investigating the Cellular Uptake of Model Nanoplastics by Single-Cell ICP-MS
Source: MDPI journal article supplement (doi:10.3390/nano13030594), 2023-02-01
Supplement: s1 [file s1]

# Investigating the Cellular Uptake of Model Nanoplastics by Single Cell ICP-MS

Domenico Cassano<sup>1</sup>, Alessia Bogni<sup>1</sup>, Rita La Spina<sup>1</sup>, Douglas Gilliland<sup>1</sup>, and Jessica Ponti<sup>1,\*</sup>

<sup>1</sup> European Commission, Joint Research Centre (JRC), Ispra, Italy

\* Correspondence: [jessica.ponti@ec.europa.eu](mailto:jessica.ponti@ec.europa.eu)

## Supporting Information

**Figure S1**

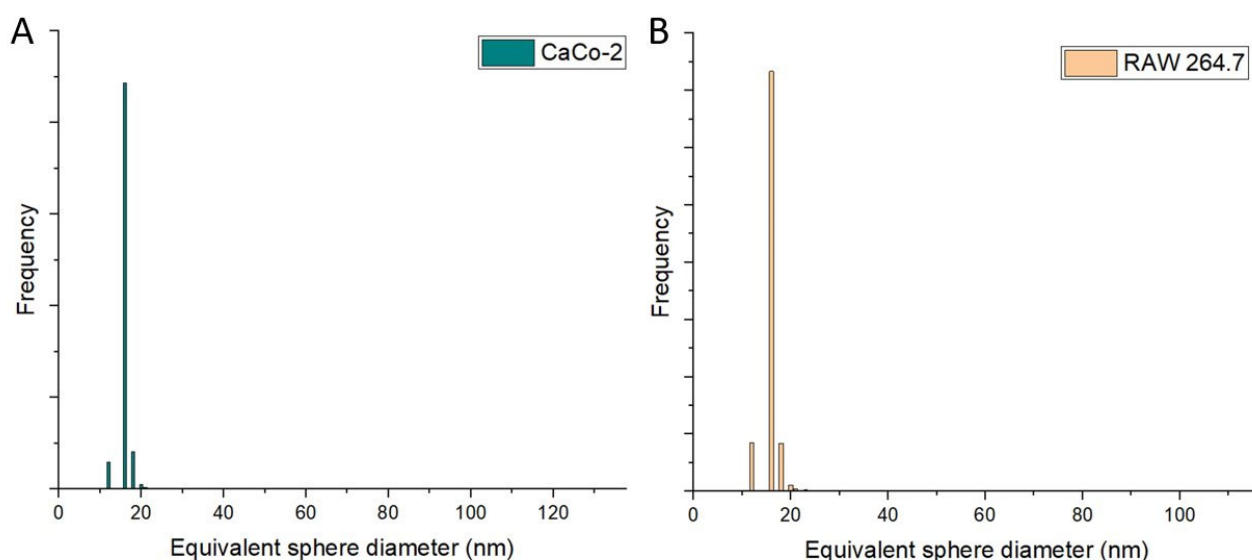

**Figure S1.** Equivalent sphere diameter of control CaCo-2 (A) and RAW 264.7 (B) cells. The distributions are almost identical and are likely arising from background noise of scICP-MS instrument.

**Figure S2**

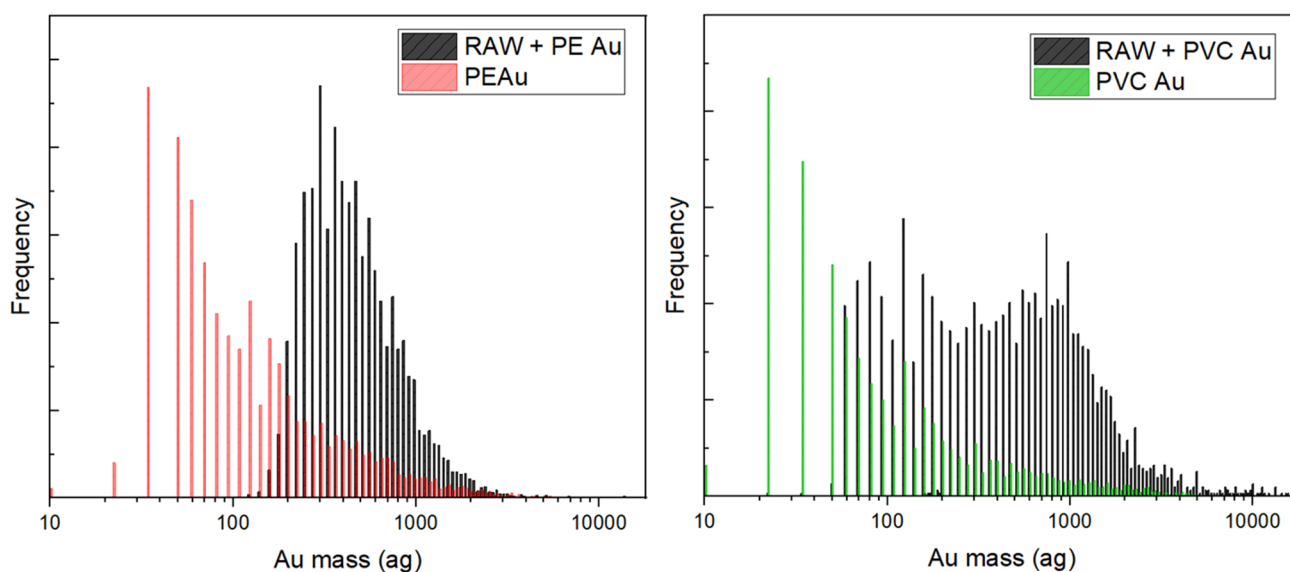

**Figure S2.** (left) Au mass distribution of PE Au (red) and RAW 264.7 cells incubated with PE Au for 48 hours (black) at the concentration of  $1 \mu\text{g mL}^{-1}$ . (right) Au mass distribution of PVC Au (green) and RAW 264.7 cells incubated with PVC Au for 48 hours (black) at the concentration of  $1 \mu\text{g mL}^{-1}$ .

**Figure S3**

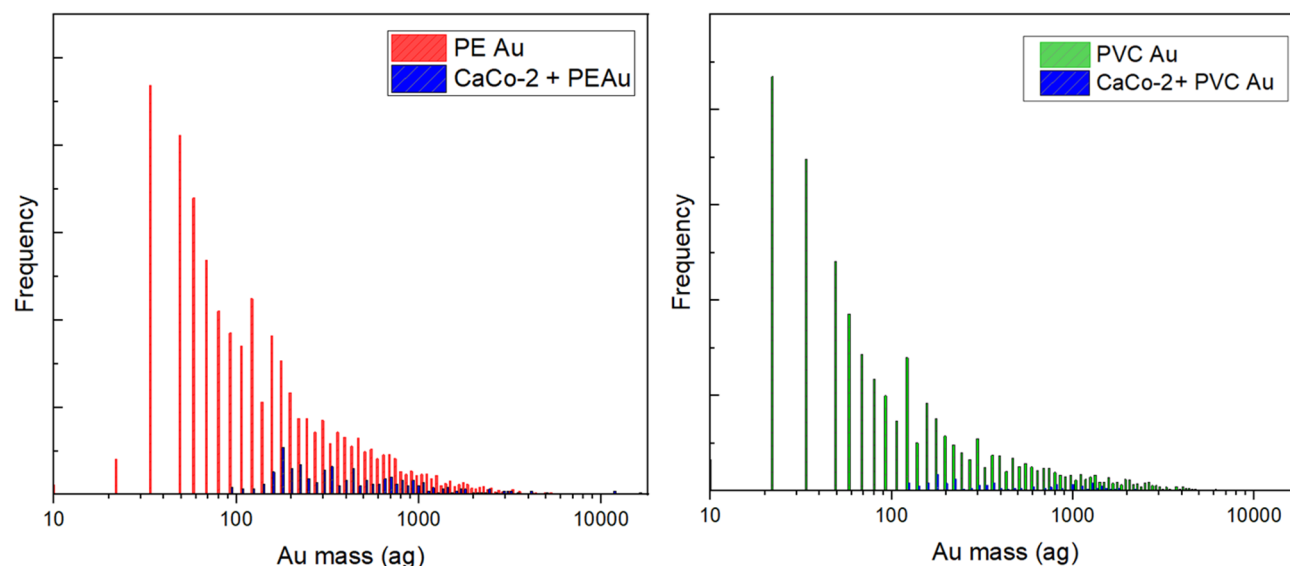

**Figure S3.** (left) Au mass (actograms) distribution of PE Au (red) and CaCo-2 cells incubated with PE Au for 48 hours (blue) at the concentration of  $1 \mu\text{g mL}^{-1}$ . (right) Au mass (actograms) distribution of PVC Au (green) and CaCo-2 cells incubated with PVC Au for 48 hours (blue) at the concentration of  $1 \mu\text{g mL}^{-1}$ .

**Figure S4**

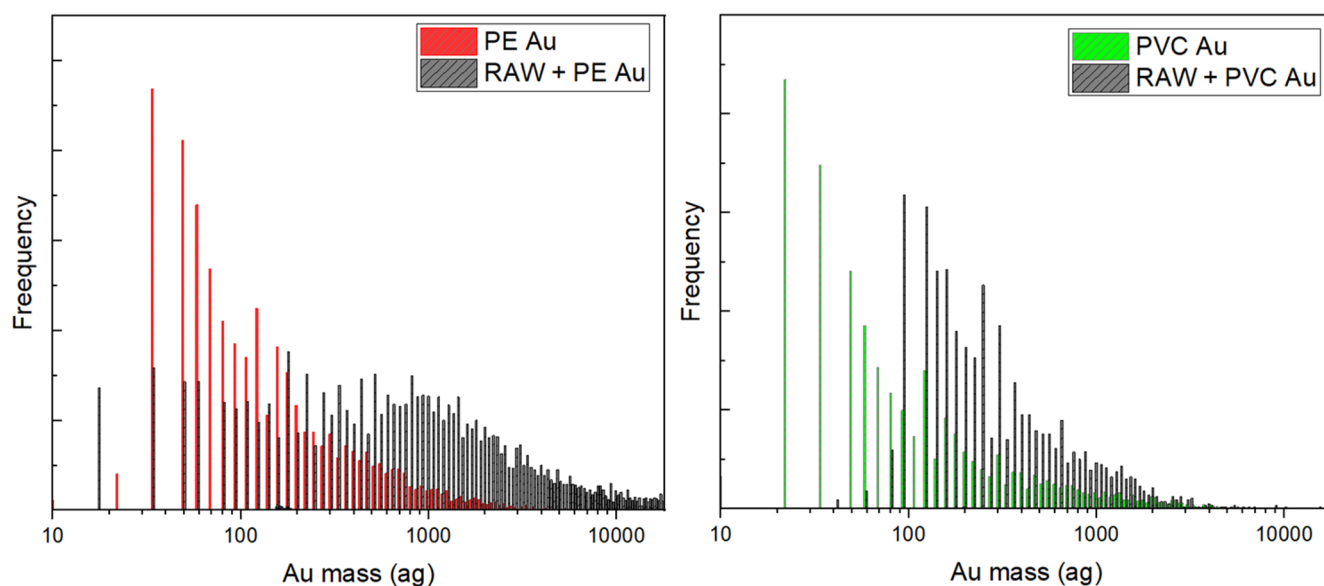

**Figure S4.** (left) Au mass (actograms) distribution of PE Au (red) and RAW 264.7 cells incubated with PE Au for 48 hours (black) at the concentration of  $100 \mu\text{g mL}^{-1}$ . (right) Au mass (actograms) distribution of PVC Au (green) and RAW 264.7 cells incubated with PVC Au for 48 hours (black) at the concentration of  $100 \mu\text{g mL}^{-1}$ .

**Figure S5**

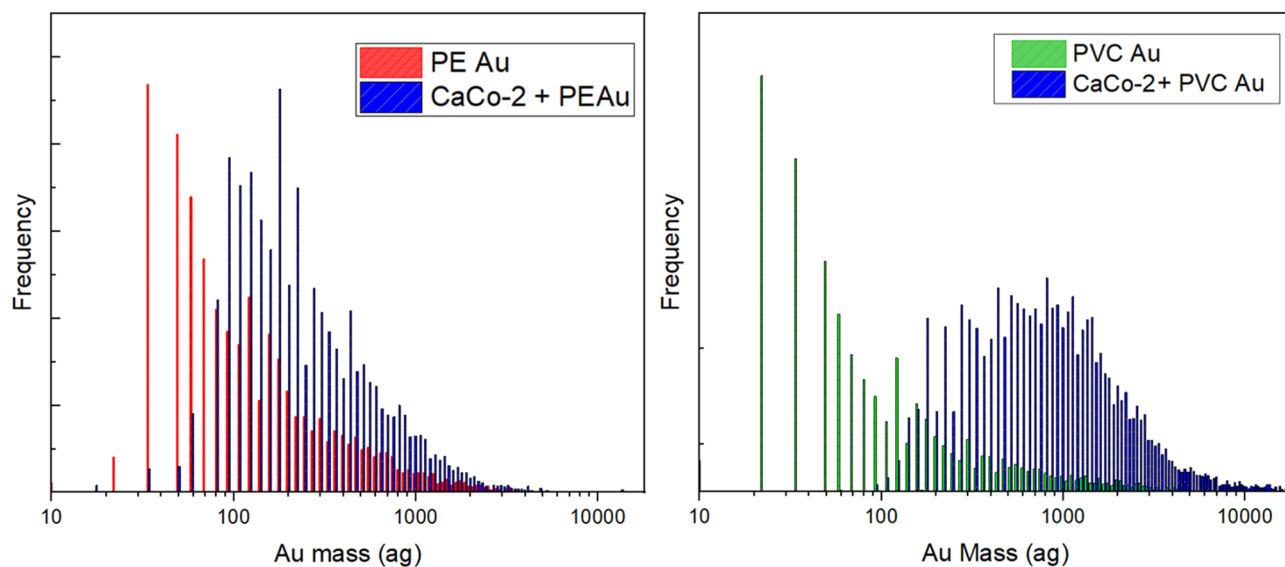

**Figure S5.** (left) Au mass (actograms) distribution of PE Au (red) and CaCo-2 cells incubated with PE Au for 48 hours (blue) at the concentration of  $100 \mu\text{g mL}^{-1}$ . (right) Au mass (actograms) distribution of PVC Au (green) and CaCo-2 cells incubated with PVC Au (blue) for 48 hours at the concentration of  $100 \mu\text{g mL}^{-1}$ .
